# Supplementary material for: Comparison of Synapse 3D system (Version 4.4) and DirectPath system (Version 2.0) in virtual bronchoscopic navigation application for peripheral pulmonary nodules
Source: PubMed Central journal article supplement — Ther Adv Respir Dis. 2024 Dec 15;18:17534666241307182. doi: 10.1177/17534666241307182 (PMC11648045; doi:10.1177/17534666241307182), 2024-12-15
Supplement: sj-pdf-1-tar-10.1177_17534666241307182.pdf [file sj-pdf-1-tar-10.1177_17534666241307182.pdf]

## Contents

|                                               |                               |
|-----------------------------------------------|-------------------------------|
| <a href="#"><u>Supplementary Figure 1</u></a> | <a href="#"><u>Page 2</u></a> |
| <a href="#"><u>Supplementary Figure 2</u></a> | <a href="#"><u>Page 3</u></a> |
| <a href="#"><u>Supplementary Figure 3</u></a> | <a href="#"><u>Page 4</u></a> |
| <a href="#"><u>Supplementary Table 1</u></a>  | <a href="#"><u>Page 5</u></a> |
| <a href="#"><u>Supplementary Table 2</u></a>  | <a href="#"><u>Page 5</u></a> |
| <a href="#"><u>Supplementary Table 3</u></a>  | <a href="#"><u>Page 6</u></a> |
| <a href="#"><u>Supplementary Table 4</u></a>  | <a href="#"><u>Page 7</u></a> |
| <a href="#"><u>Supplementary Table 5</u></a>  | <a href="#"><u>Page 8</u></a> |

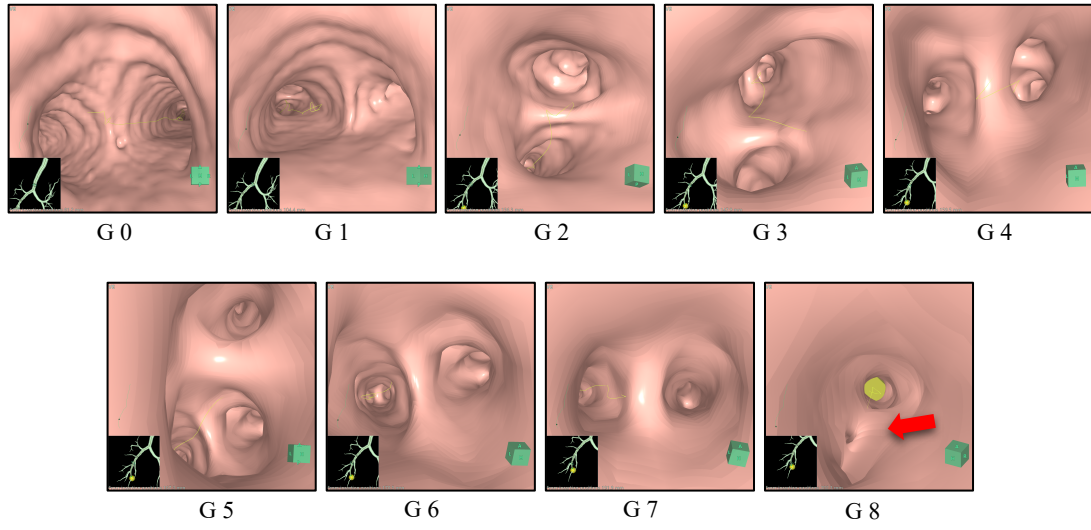

**Supplementary Figure 1** Most distantly visible and optimal bronchial branch generation. MVG was 8 generation and OG was 7 generation due to indistinguishable bronchial bifurcation (red arrow). (G: Generation)

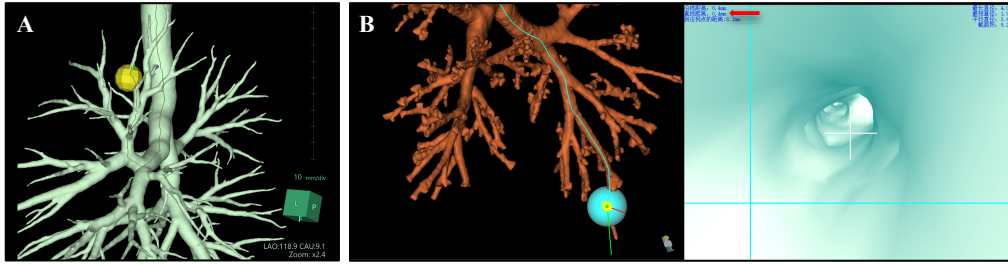

**Supplementary Figure 2** The distance from the navigation endpoint to the center of the lesion. A (Synapse 3D system): For the navigation endpoint crossing the lesion along the navigation pathway, DEC was the negative of the sum of the distance from the navigation endpoint to target lesion edge and the semidiameter of that (in this case, DEC was -12.6mm); B (DirectPath system): DEC was shown on VB image (in this case, DEC was 0.4 mm) (red arrow).

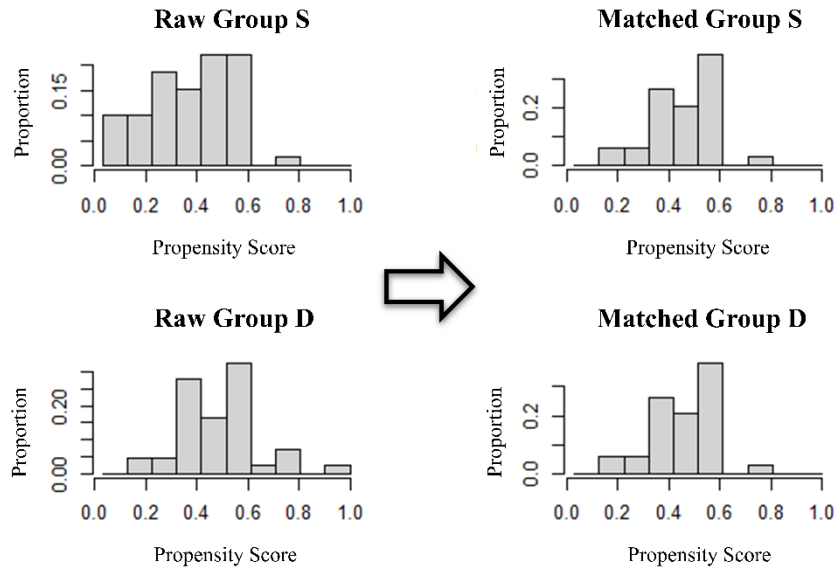

**Supplementary Figure 3** Distribution plot of before and after PSM

**Supplementary Table 1** Demographic and chest CT scan data characteristics of the patients

|                                             | Patients (n=289) |
|---------------------------------------------|------------------|
| Sex                                         |                  |
| Female                                      | 148 (51.2%)      |
| Male                                        | 141 (48.8%)      |
| Age, Mean $\pm$ SD, years                   | 55 $\pm$ 14      |
| Chest CT scan sequence                      |                  |
| Plain scan sequence                         | 207 (71.6%)      |
| Contrast-enhanced scan sequence             | 82 (28.4%)       |
| Image reconstruction parameter <sup>‡</sup> |                  |
| 1mm*1mm, L (L-type CT data)                 | 169 (58.5%)      |
| 1mm*0.8mm, LARGE-FC 56/55 (FC-type CT data) | 64 (22.1%)       |
| 0.67mm*0.67mm, B (B-type CT data)           | 56 (19.4%)       |

<sup>‡</sup>reconstruction slice thickness\*slice interval, algorithm

**Supplementary Table 2** Characteristics of pulmonary nodules in the patients

|                                | Nodules (n=289) |
|--------------------------------|-----------------|
| Lesion size (diameter on CT)   |                 |
| Median (Q1, Q3), mm            | 9.5 (7.0, 14.0) |
| $\leq 10$ mm                   | 157 (54.3%)     |
| 10- $\leq 20$ mm               | 103 (35.6%)     |
| 20- $\leq 30$ mm               | 29 (10.0%)      |
| Texture on CT                  |                 |
| Solid                          | 145 (50.2%)     |
| Part-solid                     | 53 (18.3%)      |
| Pure ground glass              | 91 (31.5%)      |
| Lobe location                  |                 |
| Upper lobe                     | 128 (44.3%)     |
| Middle lobe (Lingula)          | 65 (22.5%)      |
| Lower lobe                     | 96 (33.2%)      |
| Bronchus sign                  |                 |
| Absent                         | 150 (51.9%)     |
| Present                        | 139 (48.1%)     |
| Nodule location from the hilum |                 |
| Peripheral 1/3                 | 213 (73.7%)     |
| Inner 2/3                      | 76 (26.3%)      |

**Supplementary Table 3** Bronchial tree reconstruction quality for two VBN systems

|                                           | Level  | Group S     | <i>P</i> value | Group D     | <i>P</i> value | <i>P</i> value |
|-------------------------------------------|--------|-------------|----------------|-------------|----------------|----------------|
| Total                                     | Good   | 148 (52.1%) |                | 40 (14.1%)  |                | <0.001         |
|                                           | Medium | 90 (31.7%)  |                | 126 (44.4%) |                |                |
|                                           | Poor   | 46 (16.2%)  |                | 118 (41.5%) |                |                |
| Chest CT scan sequence                    |        |             |                |             |                |                |
| Plain scan sequence                       | Good   | 107 (51.7%) | 1.000          | 30 (14.5%)  | 0.438          | <0.001         |
|                                           | Medium | 68 (32.9%)  |                | 94 (45.4%)  |                |                |
|                                           | Poor   | 32 (15.5%)  |                | 83 (40.1%)  |                |                |
| Contrast-enhanced scan sequence           | Good   | 41 (53.2%)  |                | 10 (13.0%)  |                | <0.001         |
|                                           | Medium | 22 (28.6%)  |                | 32 (41.6%)  |                |                |
|                                           | Poor   | 14 (18.2%)  |                | 35 (45.5%)  |                |                |
| Image reconstruction parameter            |        |             |                |             |                |                |
| 1mm*1mm, L (L-type CT data)               | Good   | 82 (49.4%)* | 0.041          | 13 (7.8%)*  | <0.001         | <0.001         |
|                                           | Medium | 55 (33.1%)  |                | 88 (53.0%)  |                |                |
|                                           | Poor   | 29 (17.5%)  |                | 65 (39.2%)  |                |                |
| 1mm*8mm, LARGE-FC 56/55 (FC-type CT data) | Good   | 43 (69.4%)* |                | 1 (1.6%)*   |                | <0.001         |
|                                           | Medium | 9 (14.5%)   |                | 10 (16.1%)  |                |                |
|                                           | Poor   | 10 (16.1%)  |                | 51 (82.3%)  |                |                |
| 0.67mm*0.67mm, B (B-type CT data)         | Good   | 23 (41.1%)* |                | 26 (46.4%)* |                | 0.088          |
|                                           | Medium | 26 (46.4%)  |                | 28 (50.0%)  |                |                |
|                                           | Poor   | 7 (12.5%)   |                | 2 (3.6%)    |                |                |

‡ Pairwise comparison; Bonferroni correction,  $P < 0.0167$

\* Pairwise comparison; Bonferroni correction,  $P > 0.0167$

**Supplementary Table 4** Demographic and chest CT scan data characteristics in two groups

|                                 | Group S<br>(n=56) | Group D<br>(n=42) | <i>P</i> value     |
|---------------------------------|-------------------|-------------------|--------------------|
| Age, median (Q1, Q3), years     | 64 (56, 68)       | 64 (54, 71)       | 0.288              |
| Sex                             |                   |                   |                    |
| Female                          | 37.5% (21)        | 23.8% (10)        | 0.149              |
| Male                            | 62.5% (35)        | 76.2% (32)        |                    |
| Chest CT scan sequence          |                   |                   |                    |
| Plain scan sequence             | 53.6% (30)        | 33.3% (14)        | 0.046              |
| Contrast-enhanced scan sequence | 46.4% (26)        | 66.7% (28)        |                    |
| Chest CT Scanner                |                   |                   |                    |
| Toshiba                         | 14.3% (8)         | 14.3% (6)         | 0.588 <sup>#</sup> |
| Philips                         | 80.4% (45)        | 73.8% (31)        |                    |
| United Imaging                  | 5.4% (3)          | 11.9% (5)         |                    |

<sup>#</sup> Fisher's exact test

**Supplementary Table 5** Characteristics of pulmonary nodules and transbronchial biopsy of peripheral pulmonary nodules in two groups

|                                | Group S<br>(n=59) | Group D<br>(n=43) | <i>P</i> value |
|--------------------------------|-------------------|-------------------|----------------|
| Lesion size (diameter on CT)   |                   |                   |                |
| Median (Q1, Q3), mm            | 22.0 (16.5, 26.5) | 22.5 (19.0, 26.5) | 0.260          |
| ≤20mm                          | 44.1% (26)        | 30.2% (13)        | 0.156          |
| 20-≤30mm                       | 55.9% (33)        | 69.8% (30)        |                |
| Texture on CT                  |                   |                   |                |
| Solid                          | 89.8% (53)        | 86.0% (37)        | 0.558          |
| Ground glass                   | 10.2% (6)         | 14.0% (6)         |                |
| Lobe location                  |                   |                   |                |
| Upper lobe                     | 42.4% (25)        | 48.8% (21)        | 0.645          |
| Middle lobe (Lingula)          | 13.6% (8)         | 16.3% (7)         |                |
| Lower lobe                     | 44.1% (26)        | 34.9% (15)        |                |
| Bronchus sign                  |                   |                   |                |
| Absent                         | 11.9% (7)         | 9.3% (4)          | 0.929*         |
| Present                        | 88.1% (52)        | 90.7% (39)        |                |
| Nodule location from the hilum |                   |                   |                |
| Inner 2/3                      | 57.6% (34)        | 60.5% (26)        | 0.774          |
| Peripheral 1/3                 | 42.4% (25)        | 39.5% (17)        |                |
| Bronchoscope type              |                   |                   |                |
| BF-1T260/1TQ290                | 18.6% (11)        | 18.6% (8)         | 0.509#         |
| BF-260/Q290                    | 49.2% (29)        | 44.2% (19)        |                |
| BF-P260F/P290                  | 32.2% (19)        | 32.6% (14)        |                |
| BF-MP290F                      | 0 (0)             | 4.7% (2)          |                |
| Lesion confirmation technique  |                   |                   |                |
| X-ray fluoroscopy              | 8.5% (5)          | 2.3% (1)          | 0.073#         |
| R-EBUS                         | 79.7% (47)        | 95.3% (41)        |                |
| R-EBUS + X-ray fluoroscopy     | 11.9% (7)         | 2.3% (1)          |                |
| Number of sampling methods     |                   |                   |                |
| One method                     | 18.6% (11)        | 23.3% (10)        | 0.337#         |
| Two methods                    | 18.6% (11)        | 27.9% (12)        |                |
| Three methods                  | 52.5% (31)        | 46.5% (20)        |                |
| Four methods                   | 10.2% (6)         | 2.3% (1)          |                |

\* Continuity correction

# Fisher's exact test
